# Supplementary material
Source: HighWire-hosted journal article supplement (https://erj.ersjournals.com/content/54/5/1900905)
Supplement: inline-supplementary-material-1 [file inline-supplementary-material-1.pdf]

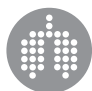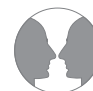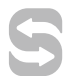

SHAREABLE PDF

# New radiological diagnostic criteria: impact on idiopathic pulmonary fibrosis diagnosis

Manuela Funke-Chambour<sup>1,2,4</sup>, Sabina A. Guler<sup>1,4</sup>, Thomas Geiser<sup>1,2</sup>,  
Andreas Christe<sup>3</sup>, Johannes Heverhagen<sup>3</sup>, Alexander Pöllinger<sup>3</sup>, Adrian Huber<sup>3</sup>  
 and Lukas Ebner<sup>3</sup>

**Affiliations:** <sup>1</sup>Dept of Pulmonary Medicine, Inselspital, Bern University Hospital, University of Bern, Bern, Switzerland. <sup>2</sup>Dept for BioMedical Research, University of Bern, Bern, Switzerland. <sup>3</sup>Dept of Diagnostic, Interventional and Pediatric Radiology, Inselspital, Bern University Hospital, University of Bern, Switzerland. <sup>4</sup>Both authors contributed equally.

**Correspondence:** Manuela Funke-Chambour. Dept of Pulmonary Medicine, Inselspital Bern, Bern 3010, Switzerland E-mail: manuela.funke-chambour@insel.ch

 @ERSpublications

**Divergent recommendations and guidelines exist for IPF. Comparison of existing guidelines indicates IPF was diagnosed with better sensitivity and preserved specificity with Fleischner recommendations compared with current clinical practice guidelines.** <http://bit.ly/2ozH9la>

**Cite this article as:** Funke-Chambour M, Guler SA, Geiser T, *et al.* New radiological diagnostic criteria: impact on idiopathic pulmonary fibrosis diagnosis. *Eur Respir J* 2019; 54: 1900905 [<https://doi.org/10.1183/13993003.00905-2019>].

This single-page version can be shared freely online.

## To the Editor:

The American Thoracic Society (ATS), European Respiratory Society (ERS), Japanese Respiratory Society (JRS) and Latin American Thoracic Society (ALAT) recently released a new clinical practice guideline (ATS/ERS/JRS/ALAT2018) for idiopathic pulmonary fibrosis (IPF) with simultaneously proposed diagnostic criteria by the Fleischner Society [1, 2]. Both diagnostic algorithms agree on most diagnostic steps, with divergent recommendations on the position of surgical lung biopsy (SLB): ATS/ERS/JRS/ALAT2018 [2] recommends SLB in most patients with a probable usual interstitial pneumonia (UIP) pattern on high-resolution computed tomography (HRCT) (conditional recommendation), whereas the Fleischner Society proposes to forgo SLB in patients with a definite or probable UIP HRCT pattern, presenting in the right clinical context [3, 4]. We aimed to quantify the impact of the previous approach (ATS/ERS/JRS/ALAT2011) [5] and the two new diagnostic approaches [1, 2] on real-life clinical practice, with assessment of radiological interrater agreement, diagnostic test characteristics, and prognostic validity of the diverging radiological diagnoses for a multidisciplinary IPF diagnosis in our cohort.
